# Supplementary material for: Effect of Micro- and Nano-Lignin on the Thermal, Mechanical, and Antioxidant Properties of Biobased PLA–Lignin Composite Films
Source: MDPI journal article supplement (doi:10.3390/polym14235274), 2022-12-02
Supplement: s1 [file s1]

## Supporting information for:

### Effect of micro- and nano-lignin on thermal, mechanical and antioxidant properties of biobased PLA/lignin composite films

Sofia P. Makri<sup>1,2</sup>, Eleftheria Xanthopoulou<sup>2</sup>, Panagiotis A. Klonos<sup>2,3</sup>, Alexios Grigoropoulos<sup>1</sup>, Apostolos Kyritsis<sup>3</sup>, Konstantinos Tsachouridis<sup>4</sup>, Antonios Anastasiou<sup>4</sup>, Ioanna Deligkiozi<sup>1</sup>, Nikolaos Nikolaidis<sup>2</sup> and Dimitrios N. Bikiaris<sup>2,\*</sup>

<sup>1</sup> Creative Nano PC, 43 Tatoiou, Metamorfosi 14451, Athens, Greece

<sup>2</sup> [Department of Chemistry, Laboratory of Polymer Chemistry and Technology, Aristotle University of Thessaloniki](#), GR-541 24, Thessaloniki, Greece

<sup>3</sup> Department of Physics, National Technical University of Athens (NTUA), Zografou Campus, 15780, Athens, Greece

<sup>4</sup> Department of Chemical Engineering and Analytical Science, University of Manchester, Manchester M1 3AL, UK

\* Correspondence: [dbic@chem.auth.gr](mailto:dbic@chem.auth.gr) (D.N.B.)

## Characterization of Lignin/ Nanolignin

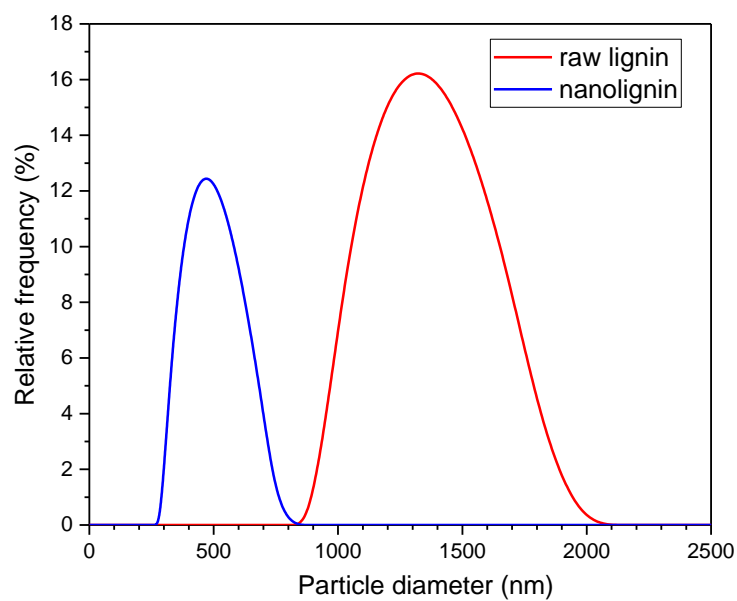

Figure S1. Particle size distribution curve of raw soda lignin and nanolignin corresponding to hydrodynamic diameter of 2.38  $\mu\text{m}$  (polydispersity index, PDI = 0.29) and 524 nm (PDI = 0.161), respectively.

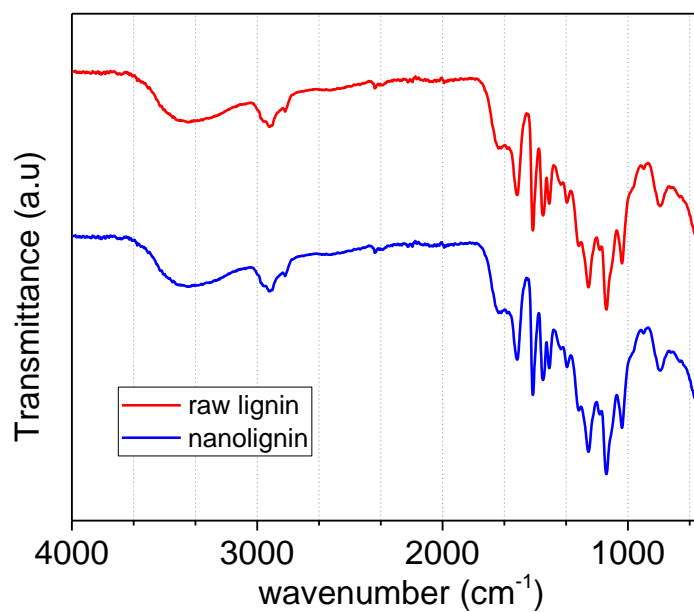

Figure S2. FTIR spectra of soda lignin and nanolignin.

Scanning Electron Microscopy (SEM)

|                                                                                                                                                       |                                                                                                                                                      |
|-------------------------------------------------------------------------------------------------------------------------------------------------------|------------------------------------------------------------------------------------------------------------------------------------------------------|
| PLA neat                                                                                                                                              |                                                                                                                                                      |
| 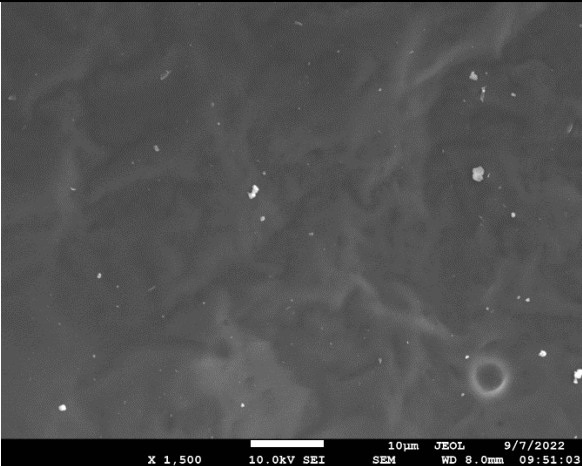 <p>X 1,500 10.0kV SEI SEM 10µm JEOL 9/7/2022 WD 8.0mm 09:51:03</p> |                                                                                                                                                      |
| PLA-0.5%wt L                                                                                                                                          | PLA-0.5%wt NL                                                                                                                                        |
|  <p>X 1,500 5.0kV SEI SEM 10µm JEOL 9/7/2022 WD 8.0mm 10:14:12</p>  |  <p>X 500 5.0kV SEI SEM 10µm JEOL 9/7/2022 WD 8.0mm 09:57:32</p>  |
| PLA-1.0%wt L                                                                                                                                          | PLA-1.0%wt NL                                                                                                                                        |
|  <p>X 500 5.0kV SEI SEM 10µm JEOL 9/7/2022 WD 7.9mm 10:16:45</p>   |  <p>X 500 5.0kV SEI SEM 10µm JEOL 9/7/2022 WD 8.0mm 10:01:46</p> |
| PLA-2.5%wt L                                                                                                                                          | PLA-2.5%wt NL                                                                                                                                        |

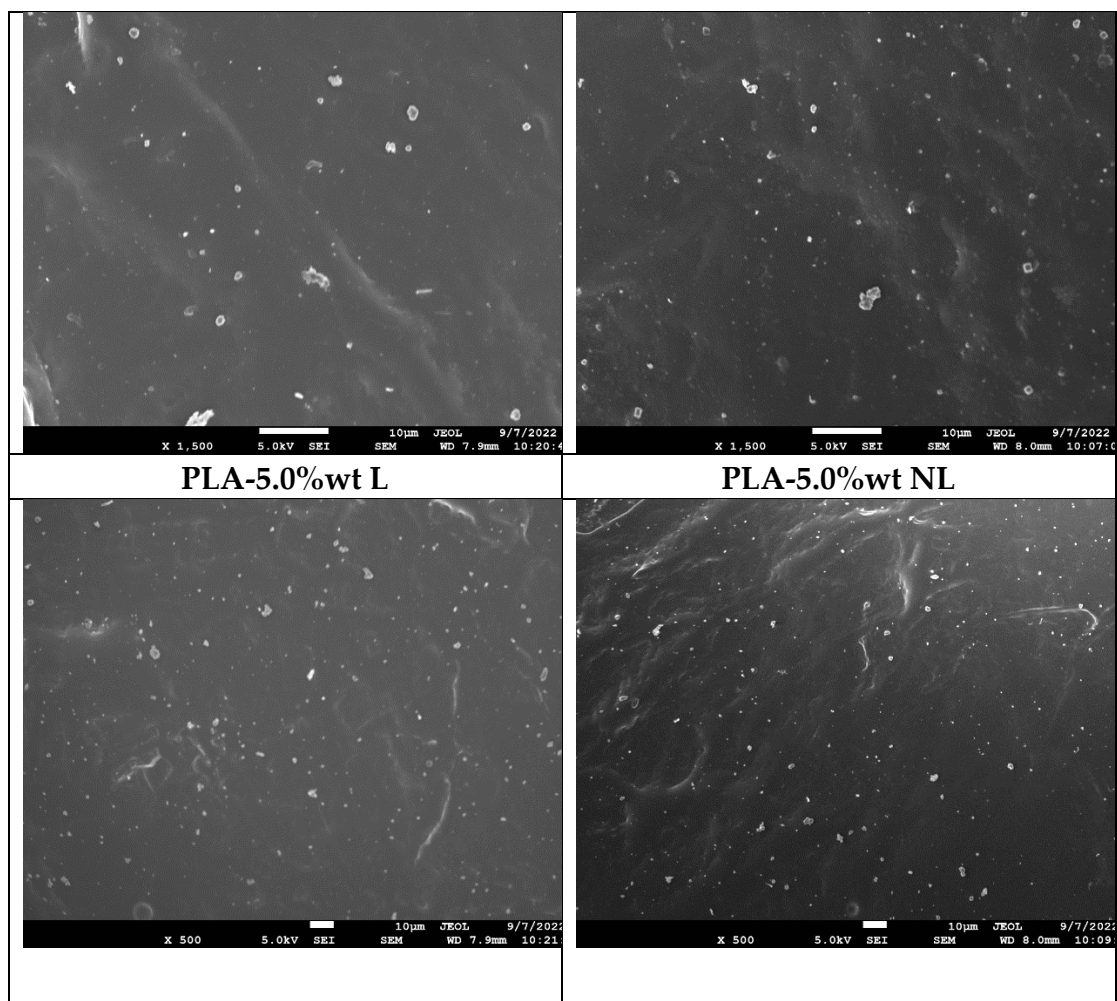

Figure S3. SEM images of PLA-L/ NL composites containing different L/NL content.

## Mechanical properties

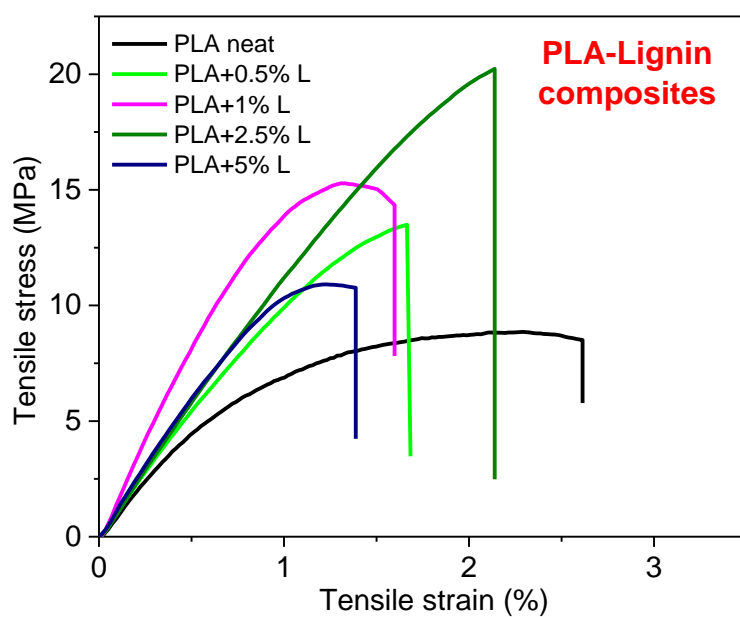

Figure S4. Tensile stress-strain curves of PLA-L composites.

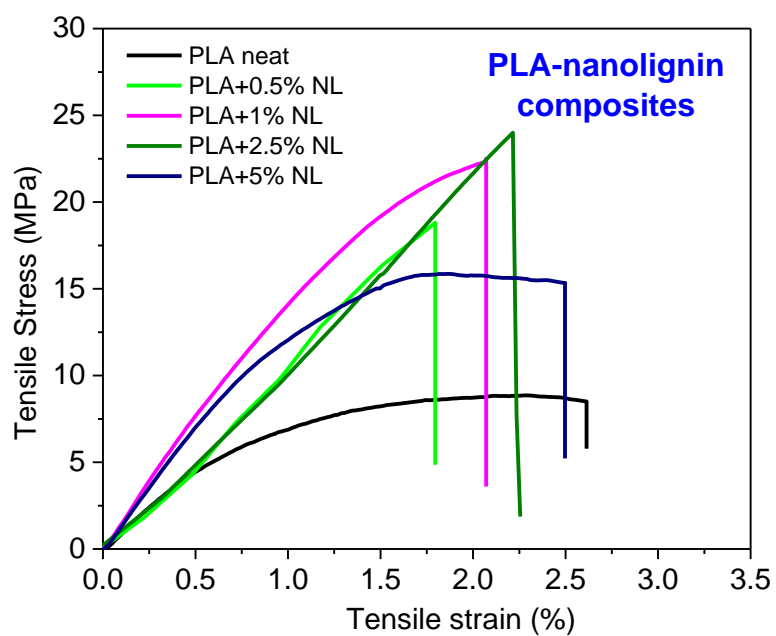

Figure S5. Tensile stress-strain curves of PLA-NL composites.

## *Antioxidant activity of composites*

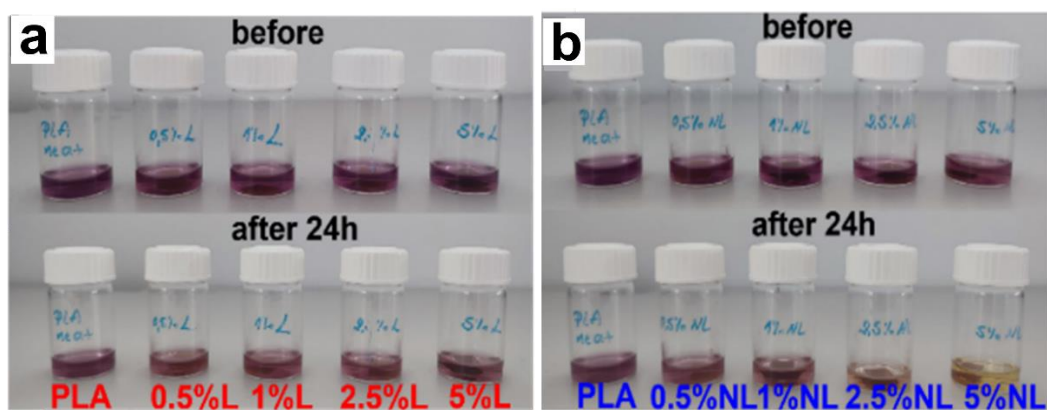

Figure S6. Qualitative antioxidant capacity of composites- Photographs of the DPPH / ethanol solution for different PLA-Lignin (a) and PLA-Nanolignin (b) composites after 24 h exposure to PLA-L/NL films.
